# Supplementary material
Source: PubMed Central journal article supplement (PMC10991874)
Supplement: 262_2023_3537_MOESM1_ESM.pdf [file 262_2023_3537_MOESM1_ESM.pdf]

**Cancer Immunology, Immunotherapy (submitted in 2023) – Yan Luo et al.  
Supplementary Figures**

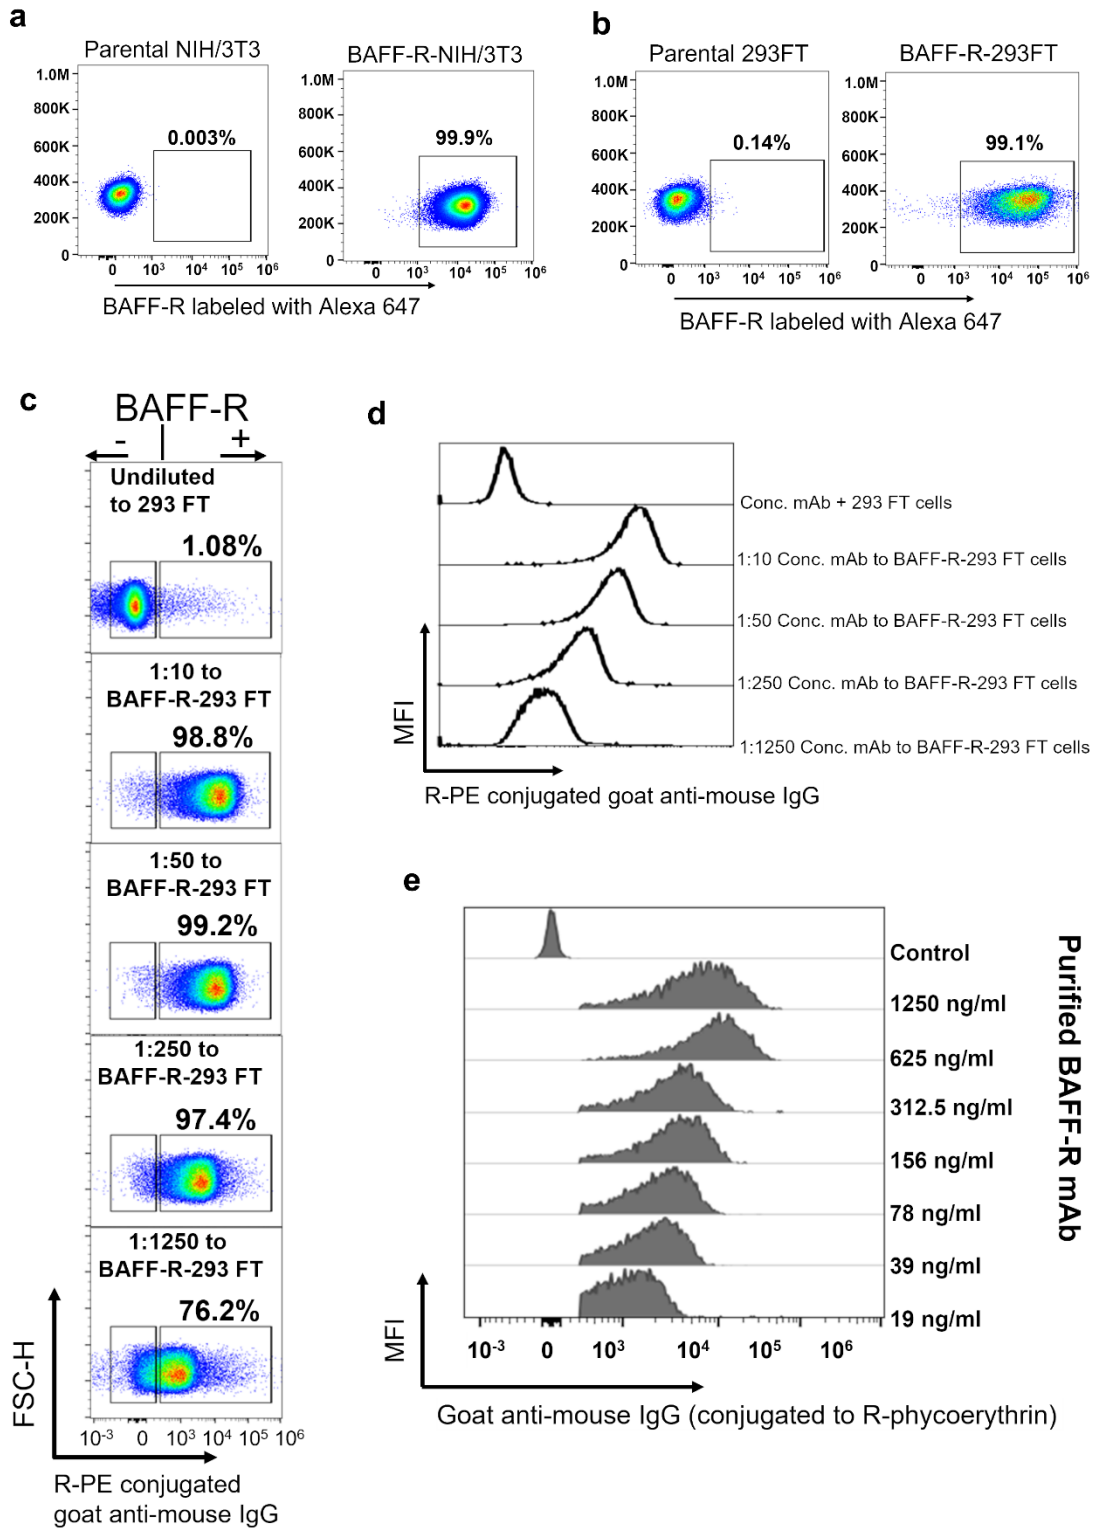

**Supplementary Fig. 1 Generation of a novel anti-BAFF-R antibody.** BAFF-R-pCDH (pCDH cDNA Cloning and Expression Lentivectors, System Biosciences, Palo Alto, CA.) lentivirus infected NIH/3T3 or 293FT cells were selected with 1 µg/mL puromycin (Sigma-Aldrich, St. Louis, MO, USA) for 1 week; single-cell clones were established from sorted BAFF-R positive NIH/3T3 or BAFF-R positive 293FT cells, and a BAFF-R expressing NIH/3T3 cell clone were used as the immunogen for BAFF-R monoclonal antibody development. The expression of BAFF-R in a BAFF-R-NIH/3T3 single-cell clone (**a**) or a BAFF-R-293FT cell line (**b**) was confirmed by flow cytometry. **c.** Crude C21 hybridoma supernatants were screened for antigen specific binding using BAFF-R-positive and BAFF-R-negative 293FT cells with a 5-fold serial diluted concentration to generate this representative data. **d.** The antigen specific binding was detected with R-PE conjugated goat anti-mouse IgG for 30 mins at 4°C. **e.** Antigen specific binding affinity of purified mAb C21 with serial diluted concentration (from 19 ng/ml to 1250 ng/ml) to BAFF-R-positive and BAFF-R-negative 293FT cells.

**a**

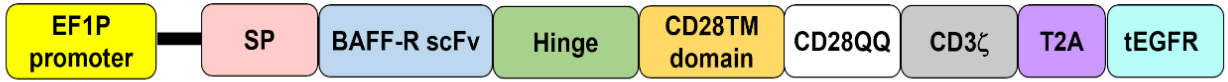

**b**

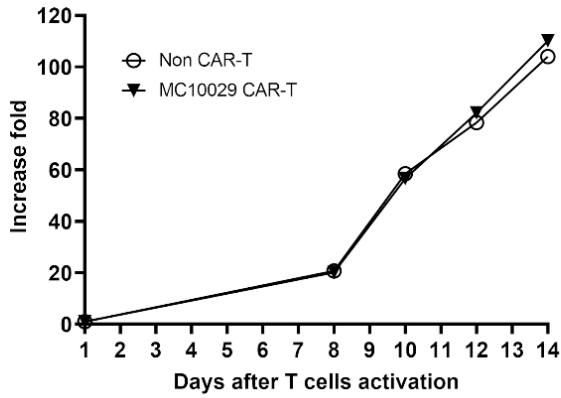

**c**

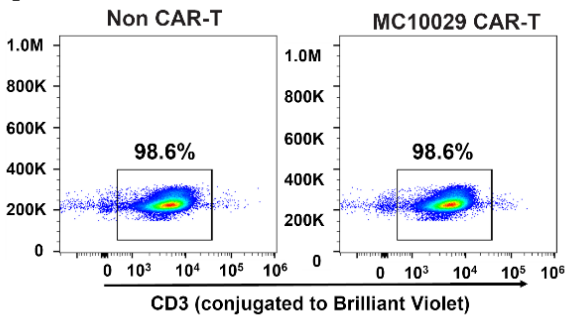

**d**

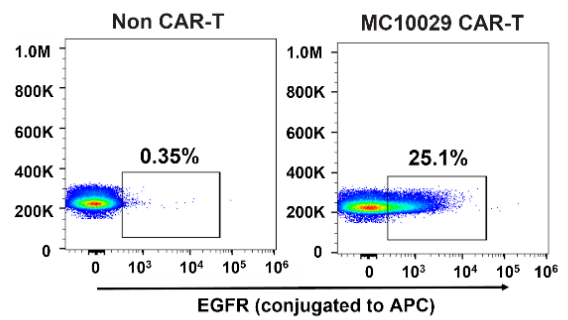

**e**

|                             | Production 1 |               | Production 2 |               | Production 3 |               |
|-----------------------------|--------------|---------------|--------------|---------------|--------------|---------------|
|                             | Non CAR-T    | MC10029 CAR-T | Non CAR-T    | MC10029 CAR-T | Non CAR-T    | MC10029 CAR-T |
| Fold expansion              | 87.2         | 82.6          | 76.5         | 72.6          | 82.3         | 90.2          |
| Viability(%) $\geq$ 70%@D14 | 92           | 94            | 89           | 88            | 91           | 93            |
| Identity(%) $\geq$ 80%      | 99.0         | 98.7          | 99.7         | 99.8          | 97.9         | 98.3          |
| Potency(%) $\geq$ 10%       | 0.18         | 23.9          | 0.34         | 22.6          | 0.34         | 21.7          |

**Supplementary Fig. 2 MC10029 CAR construct and initial characterization of MC10029 CAR-T cells production.** **a.** Schematic diagram the functional elements within the CAR design. The construct included the following elements in tandem: signal peptide (SP); the scFv of our novel BAFF-R antibody; a IgG4 hinge; CD28 transmembrane (TM) domain; CD28 costimulatory domain (CD28QQ); CD3 $\zeta$ ; T2A (self-cleaving 2A peptide); and tEGFR (truncated epidermal growth factor receptor). **b.** Fold expansion of CAR-T cells was calculated from day 1 to day 14 by measuring the number of viable CAR-T cells by trypan blue exclusion using Bio-Rad Cell counter. Non CAR-T cells from the same donor were used as controls. **c,d.** MC10029 CAR-T cells were stained with antibodies to measure surface expression of CD3 for identity (**c**) or EGFR for potency (**d**) to characterize the CAR-T cells with the data shown in these representative flow cytometry dot plots. Non CAR-T cells from the same donor were used as controls. **e.** These characterization assays were performed on three production batches of MC10029 CAR - T cells that were used in various in vitro assays. Each batch of CAR-T cells destined for research testing were evaluated for cell quality with Fold Expansion ( > 25) and Viability ( > 70%, as determined by Trypan Blue staining) as well as CAR-T cell specific characterization with Identity ( > 80%, as determined by flow cytometry for CD3 positive cells) and Potency ( > 10%, as determined by flow cytometry for EGFR positive T cells). EGFR is a transgene that is accepted as a measure of potency, per guidance documents for CAR-T cell product development.

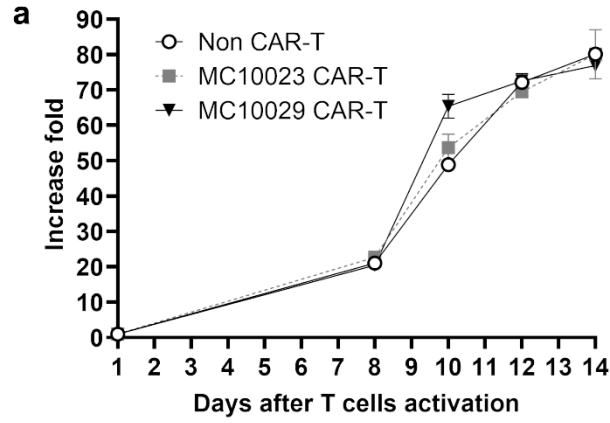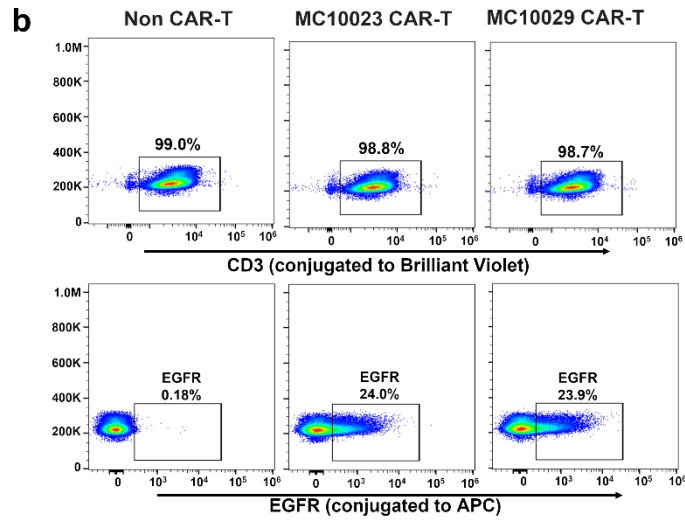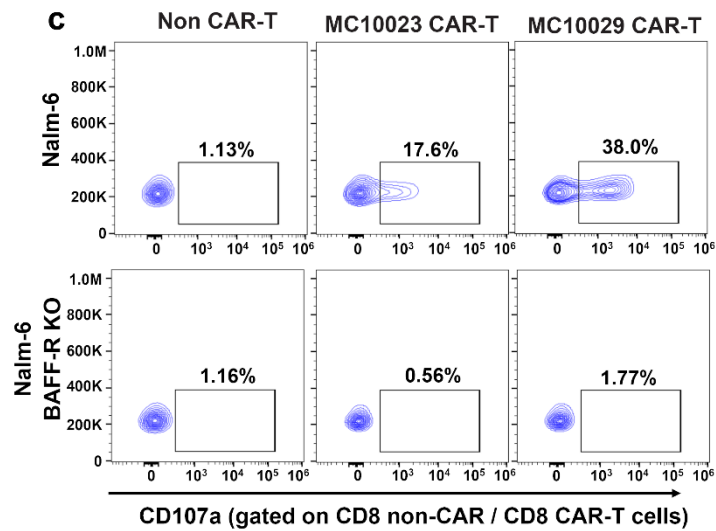

**Supplementary Fig. 3 Comparison of BAFF-R CAR-T cell constructs with differing costimulatory domains.** With the option of complementing CD3 $\zeta$  with either the CD28 costimulatory domain (MC10029) or the 4-1 BB costimulatory domain (MC10023), both CARs were generated and transduced into T cells to identify which BAFF-R CAR-T cells provided superior antigen specific cytotoxicity. **a.** Expansion of MC10023 and MC10029 CAR-T cells showed comparable fold increases by day 14. **b.** The T cell content (CD3) and the proportion of CAR-T cells (using EGFR as a proxy) within the final products of both MC10029 and MC10023 CAR-T cells are also found to be comparable. **c.** Antigen specific cytotoxicity was assayed by testing MC10023 CAR-T cells or MC10029 CAR-T cells against Nalm-6 and Nalm-6 BAFF-R KO cell lines; this degranulation assay shows the higher activity of MC10029 CAR-T cells compared to MC10023 CAR-T cells and justified the advancement of MC10029 CAR-T cells into our other experiments.

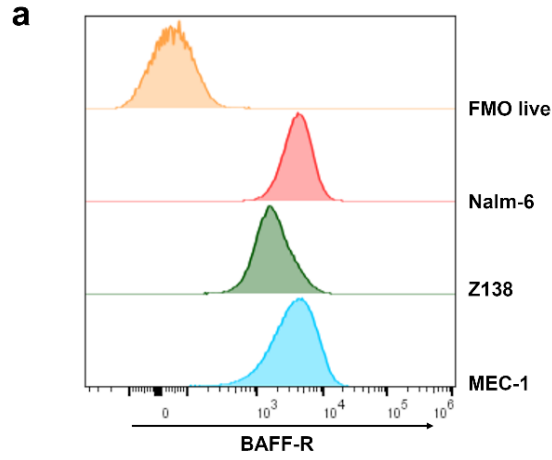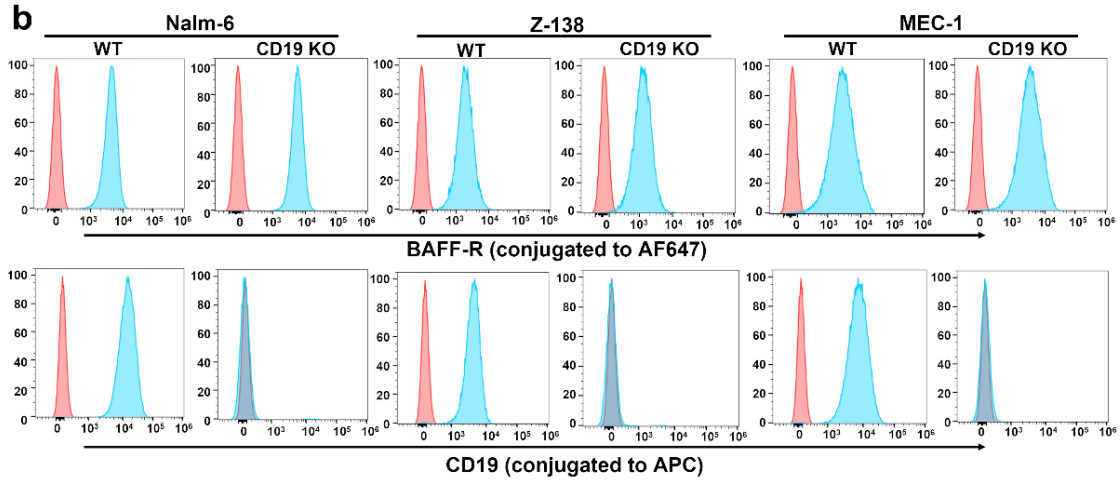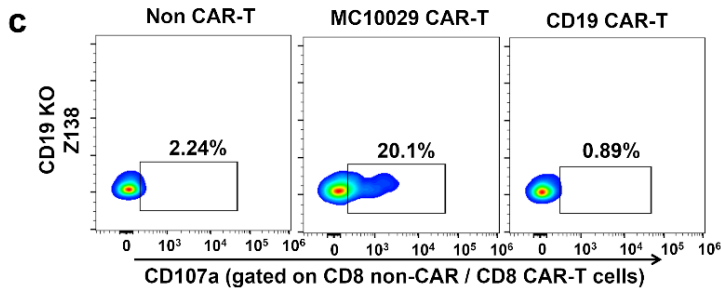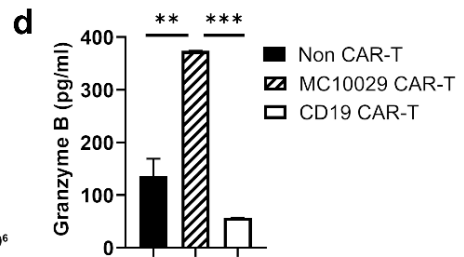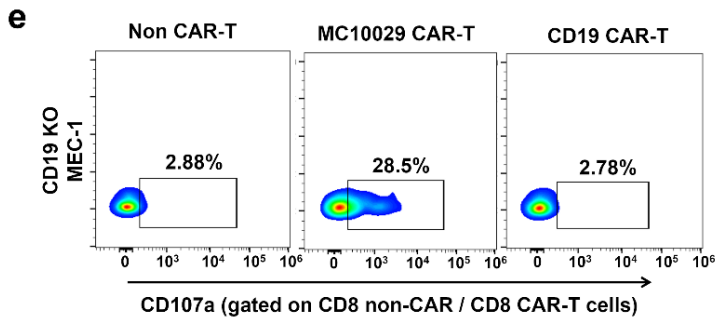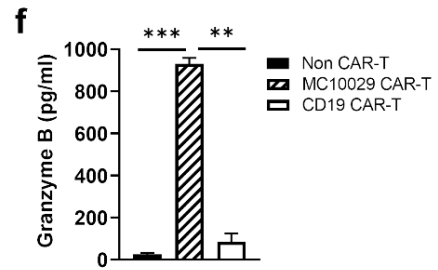

**Supplementary Fig. 4 In vitro cytotoxicity of MC10029 CAR-T cells against CD-19 deficient malignant B-cell tumor lines.** Three cell lines that are used to evaluate cytotoxicity of MC10029 CAR-T cells were tested for antigen expression. **a.** Using anti-BAFF-R-AF647 antibody, flow cytometry histograms show BAFF-R expression in Nalm-6, Z-138, or MEC-1. **b.** These cell lines were also evaluated for CD19 surface expression using anti-CD19-APC antibody. CD19 knock-out (KO) Nalm-6, Z-138, and MEC-1 variants were generated and evaluated for antigen surface expression. Flow cytometry histograms show BAFF-R expression in wild type Nalm-6, Z-138, or MEC-1 cell lines, as well as their CD19-deficient counterparts. **c, e.** Flow cytometry plots show the functional potency of CAR-T cells against CD19-deficient tumor cells by the surface expression CD107a in a degranulation assay. Non-CAR-T cells, MC10029 CAR-T cells, or CD19 CAR-T cells were generated from the same donor and incubated with CD19-deficient Z-138 (**c**) or CD19-deficient MEC-1 (**e**) cells at an E:T ratio of 2:1 to characterize the cytotoxicity of MC10029 CAR-T cells against these CD19-deficient tumor cells. **d, f.** Granzyme B ELISA shows functional potency of MC10029 CAR-T cells against CD19-deficient tumor cells. Non-CAR-T cells, MC10029 CAR-T cells, or CD19 CAR-T cells were co-incubated with CD19-deficient Z-138 (**d**) or CD19-deficient MEC-1 (**f**) cells at an E:T ratio of 4:1 for 72 hours when the supernatants were harvested for subsequent ELISA. Graphed data are means of quadruplicate sampling. The data are representative of three independent experiments.



**a**

| Identifier | Disease | Gender | Age (Years) |
|------------|---------|--------|-------------|
| 1          | B-CLL   | Female | 77          |
| 2          | B-CLL   | Male   | 63          |
| 3          | B-CLL   | Female | 83          |
| 4          | B-CLL   | Male   | 78          |
| 5          | B-CLL   | Female | 65          |
| 6          | B-CLL   | Male   | 56          |
| 7          | B-CLL   | Male   | 77          |
| 8          | B-CLL   | Male   | 64          |
| 9          | B-CLL   | Female | 54          |

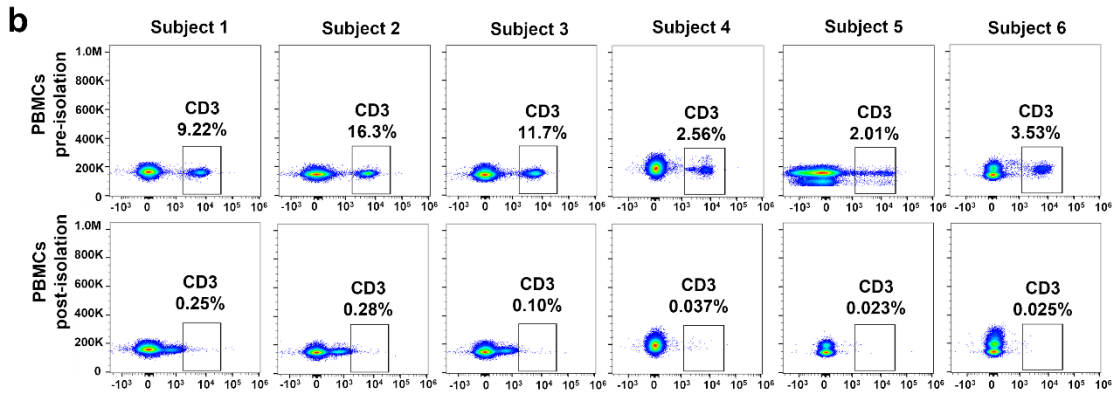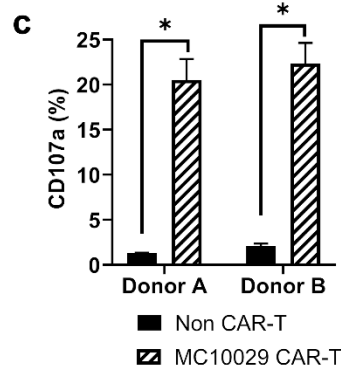

**d**

|                                | Subject 2 |                    | Subject 3 |                    | Subject 4 |                    | Subject 5 |                    |
|--------------------------------|-----------|--------------------|-----------|--------------------|-----------|--------------------|-----------|--------------------|
|                                | Non CAR-T | CAR-T <sup>1</sup> |
| <b>Granzyme A</b>              |           |                    |           |                    |           |                    |           |                    |
| pg/ml                          | 518       | 2037**             | 1169      | 3656**             | 572       | 3898**             | 320       | 1980**             |
| Fold change <sup>2</sup>       | 1         | 5.7                | 1         | 3.1                | 1         | 6.8                | 1         | 6.2                |
| <b>Perforin</b>                |           |                    |           |                    |           |                    |           |                    |
| pg/ml                          | 452       | 1413**             | 677       | 1593**             | 1056      | 3066**             | 549       | 1792**             |
| Fold change <sup>2</sup>       | 1         | 3.1                | 1         | 2.4                | 1         | 2.9                | 1         | 3.3                |
| <b>IFN-<math>\gamma</math></b> |           |                    |           |                    |           |                    |           |                    |
| pg/ml                          | 3102      | 4683**             | 1416      | 3577**             | 565       | 1336**             | 146       | 457**              |
| Fold change <sup>2</sup>       | 1         | 1.5                | 1         | 2.5                | 1         | 2.4                | 1         | 3.1                |

<sup>1</sup> CAR-T = MC10029 CAR-T cells

<sup>2</sup> Fold change is calculated by dividing pg/ml from MC10029 CAR T-cells by those from non-CAR T-cells.

**Supplementary Fig. 5 Supporting data on the activity of MC10029 CAR-T cells against primary CLL tumor cells.** **a.** Basic demographic data for the nine B-CLL subjects evaluated with MC10029 CAR-T cells. **b.** Subject PBMCs were enriched for CLL tumor cells, and the removal of endogenous T cells was confirmed in these six samples by characterizing the CD3 positive T cells in the original PBMC samples (top panels) and enriched B cell population (bottom panels). **c.** Statistical analysis of degranulation data in **Fig. 4d** shows statistical significance in cytotoxicity against primary CLL tumor cells between MC10029 CAR-T cells and Non CAR-T cells (\*  $p < 0.05$ ), while no difference was noted between Donor A and Donor B. **d.** Release of multiple granule proteins/cytokines from MC10029 CAR-T cells incubated with primary CLL tumor cells isolated from selected subjects. There was a significant increase observed in the release of granule proteins in CAR-T cell groups compared to the Non CAR-T cell groups. (\*\* $p < 0.01$ )

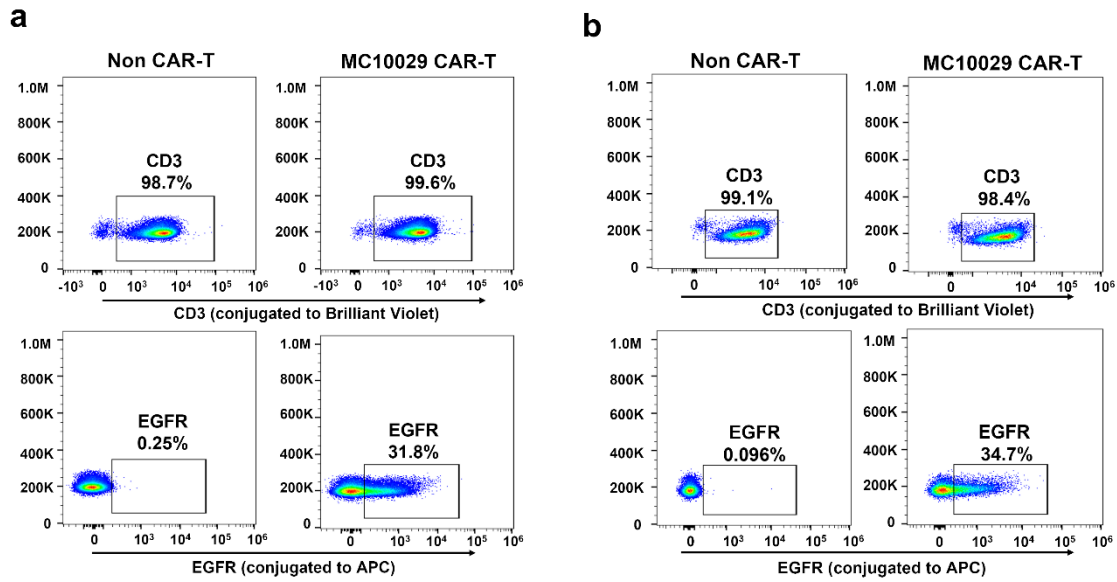

**c**

|                             | Healthy donor A |               | Healthy donor B |               |
|-----------------------------|-----------------|---------------|-----------------|---------------|
|                             | Non CAR-T       | MC10029 CAR-T | Non CAR-T       | MC10029 CAR-T |
| Fold expansion              | 82.5            | 79.5          | 59.7            | 55.7          |
| Viability(%) $\geq$ 70%@D13 | 84              | 78            | 82              | 81            |
| Identity(%) $\geq$ 80%      | 98.7            | 99.6          | 99.1            | 98.4          |
| Potency(%) $\geq$ 10%       | 0.25            | 31.8          | 0.096           | 34.7          |

**Supplementary Fig. 6 Characterization of MC10029 CAR-T cells used in the experiments shown in Figure 4.** MC10029 CAR-T cells were generated from two healthy donors and tested against primary CLL tumor cells. The two production batches of MC10029 CAR-T cells were characterized using our standard QC assays. The identity (CD3 positive cells) and the potency (EGFR positive cells) of MC10029 CAR-T cells from donor A (**a**) were nearly identical as those from donor B (**b**). (**c**) Both batches of MC10029 CAR-T cells met our requirements in terms of QC parameters, including fold expansion, viability, identity, and potency.

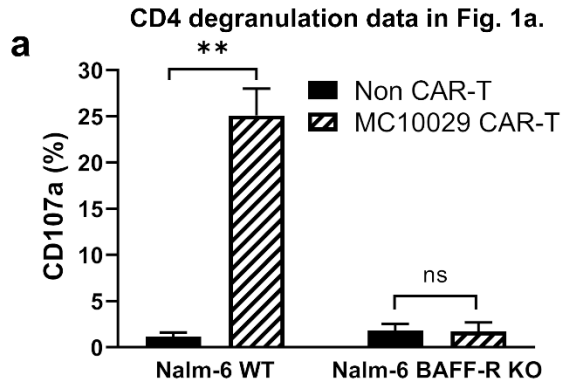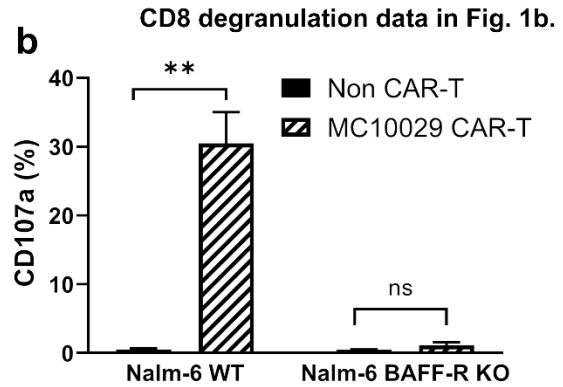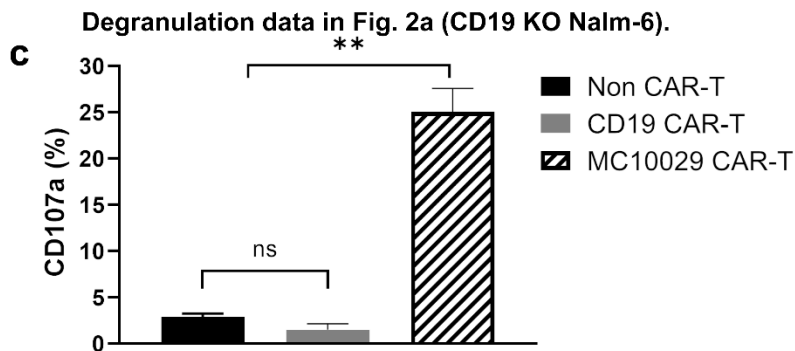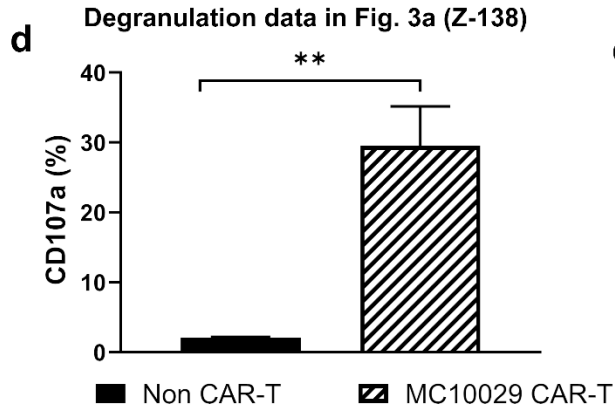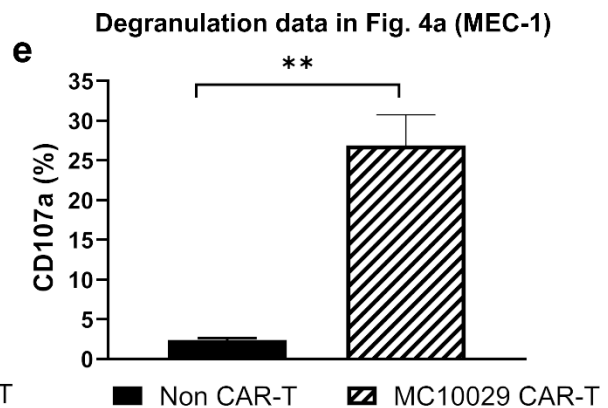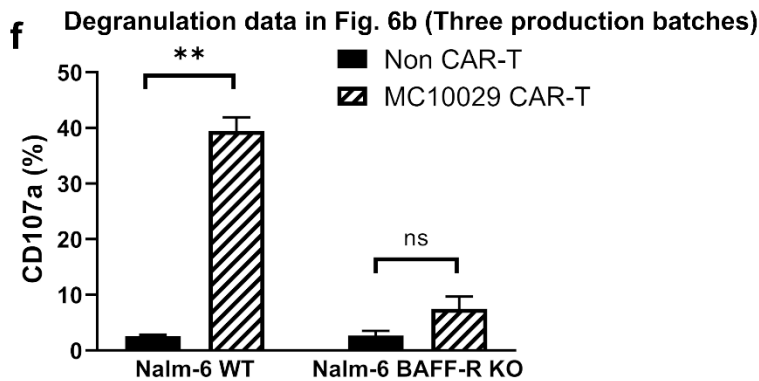

**Supplementary Fig. 7 Statistical analysis of CD107a degranulation assays. a.**

Statistical analysis of degranulation data of MC10029 CD4 CAR-T cells in Fig. 1a. **b.**

Statistical analysis of degranulation data of MC10029 CD8 CAR-T cells in Fig. 1b. **c.**

Statistical analysis of degranulation data of MC10029 CAR-T cells against CD19 KO

Nalm-6 cells in Fig. 2a. **d.** Statistical analysis of degranulation data of MC10029 CAR-T

cells against Z-138 cells in Fig. 3a. **e.** Statistical analysis of degranulation data of

MC10029 CAR-T cells against MEC-1 cells in Fig. 4a. **f.** Statistical analysis of

degranulation data of three production batches of MC10029 CAR-T cells in Fig. 6b. (\*\* p

< 0.01 ; ns: no significance)
